# Supplementary material
Source: PubMed Central journal article supplement (PMC4498206)
Supplement: supp_tpc.15.00116_TPC2015-00116-RAR1_Supplemental_Data.pdf [file supp_tpc.15.00116_TPC2015-00116-RAR1_Supplemental_Data.pdf]

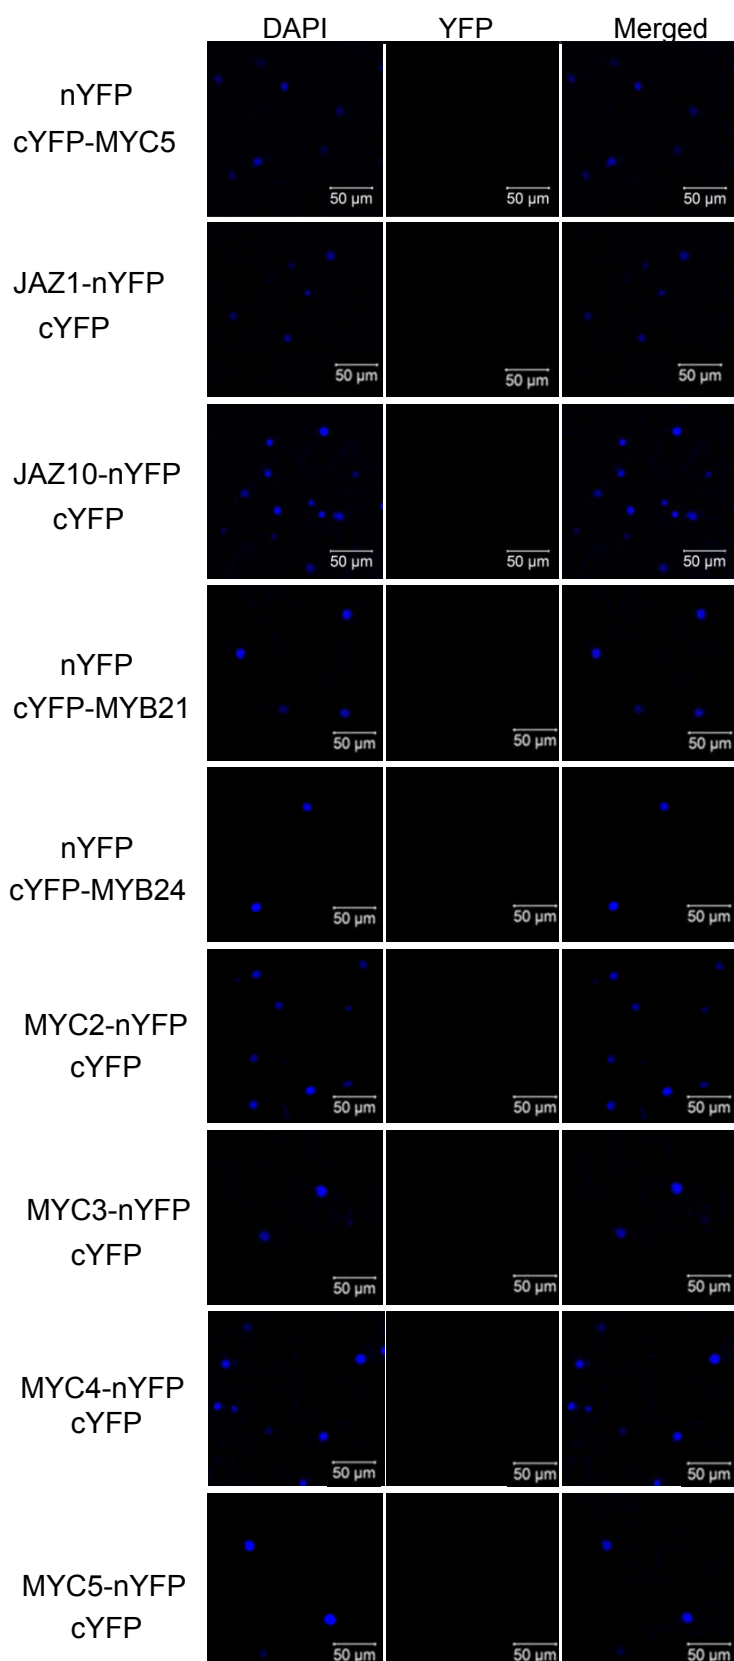

**Supplemental Figure 1. Negative Controls for the BiFC Experiments.**

No signal of YFP fluorescence was detected 50 hours after co-expression of JAZ1/JAZ10/MYC2/MYC3/MYC4/MYC5-nYFP with cYFP, or nYFP with cYFP-MYC5/MYB21/MYB24 in leaves of *N. benthamiana*. The nuclei were indicated by DAPI staining.

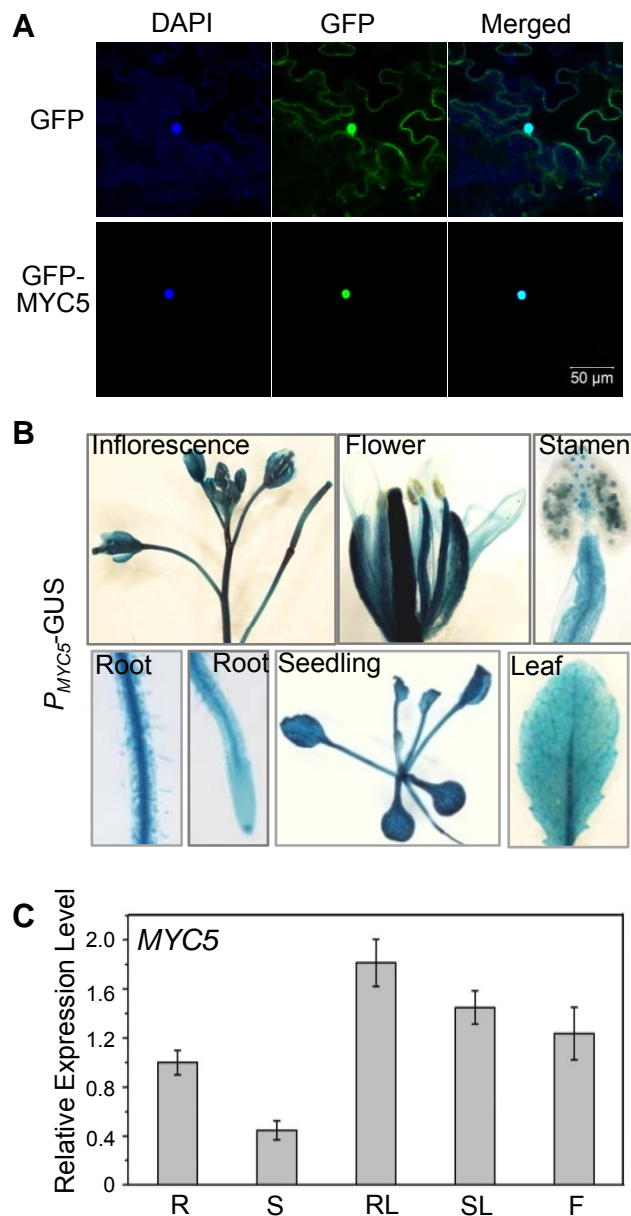

### Supplemental Figure 2. Subcellular Localization and Expression Pattern of MYC5.

(A) Subcellular localization of MYC5 in epidermal cells of *N. benthamiana* leaves. GFP fluorescence was detected 50 hours after infiltration. The nuclei were indicated by DAPI staining.

(B) The promoter of *MYC5* was fused with *GUS* gene to generate *Arabidopsis* transgenic plants ( $P_{MYC5}$ -*GUS*). Histochemical GUS activity was detected in various tissues of transgenic seedlings.

(C) Quantitative real-time PCR analysis for *MYC5* in root (R), stem (S), rosette leaf (RL), stem leaf (SL) and flower (F). *ACTIN8* was used as the internal control. Values are means ( $\pm$ SE) from three biological replicates.

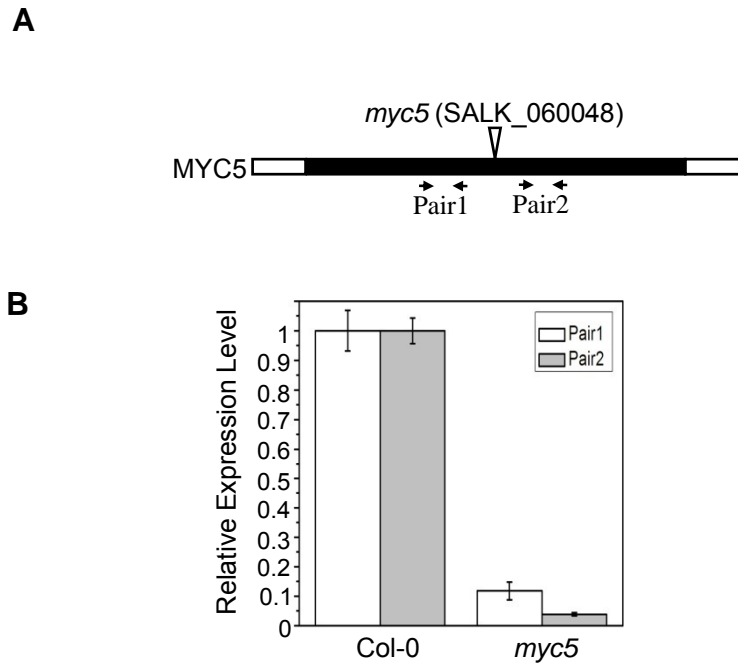

**Supplemental Figure 3. RT-qPCR Analysis of MYC5 expression in the T-DNA Insertion Mutant.**

(A) Schematic diagrams of T-DNA insertion sites in *MYC5* (at5g46830). White box, UTR; black box, exon; white triangle, T-DNA insertion site. Pair1 and Pair2, indicated by arrows, are the primer pairs for analyzing expression of *MYC5* in (B).

(B) Quantitative real-time PCR analysis for *MYC5* in Col-0 wild-type and the T-DNA insertion mutant Salk\_060048 using primer pairs indicated by arrow pairs in (A). *ACTIN8* was used as the internal control. Values are means ( $\pm$ SE) from three biological replicates.

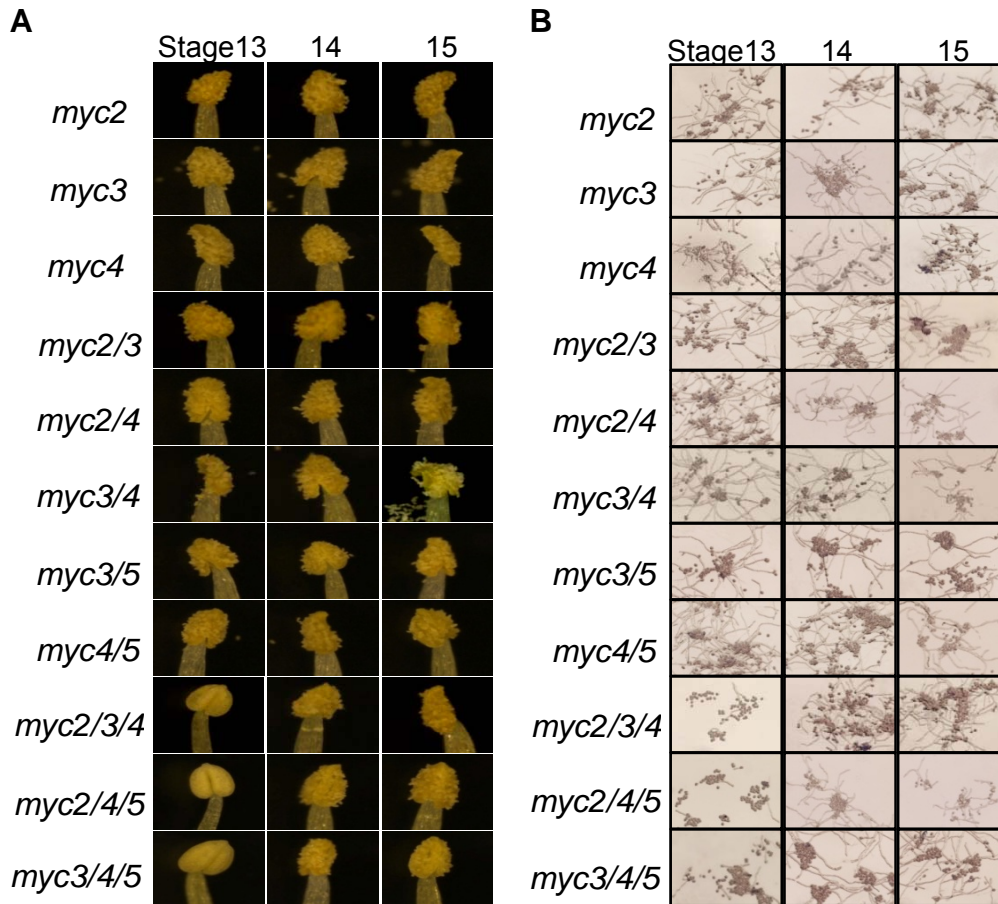

**Supplemental Figure 4. The bHLH Subgroup IIIe Factors Function Redundantly to Regulate Anther Dehiscence and Germinating Ability of Pollen.**

Comparison of anther (A) and in vitro germination of pollen grains from anther (B) at floral stage 13, 14 or 15 in *myc2*, *myc3*, *myc4*, *myc2 myc3* (*myc2/3*), *myc2 myc4* (*myc2/4*), *myc3 myc4* (*myc3/4*), *myc3 myc5* (*myc3/5*), *myc4 myc5* (*myc4/5*), *myc2 myc3 myc4* (*myc2/3/4*), *myc2 myc4 myc5* (*myc2/4/5*) and *myc3 myc4 myc5* (*myc3/4/5*).

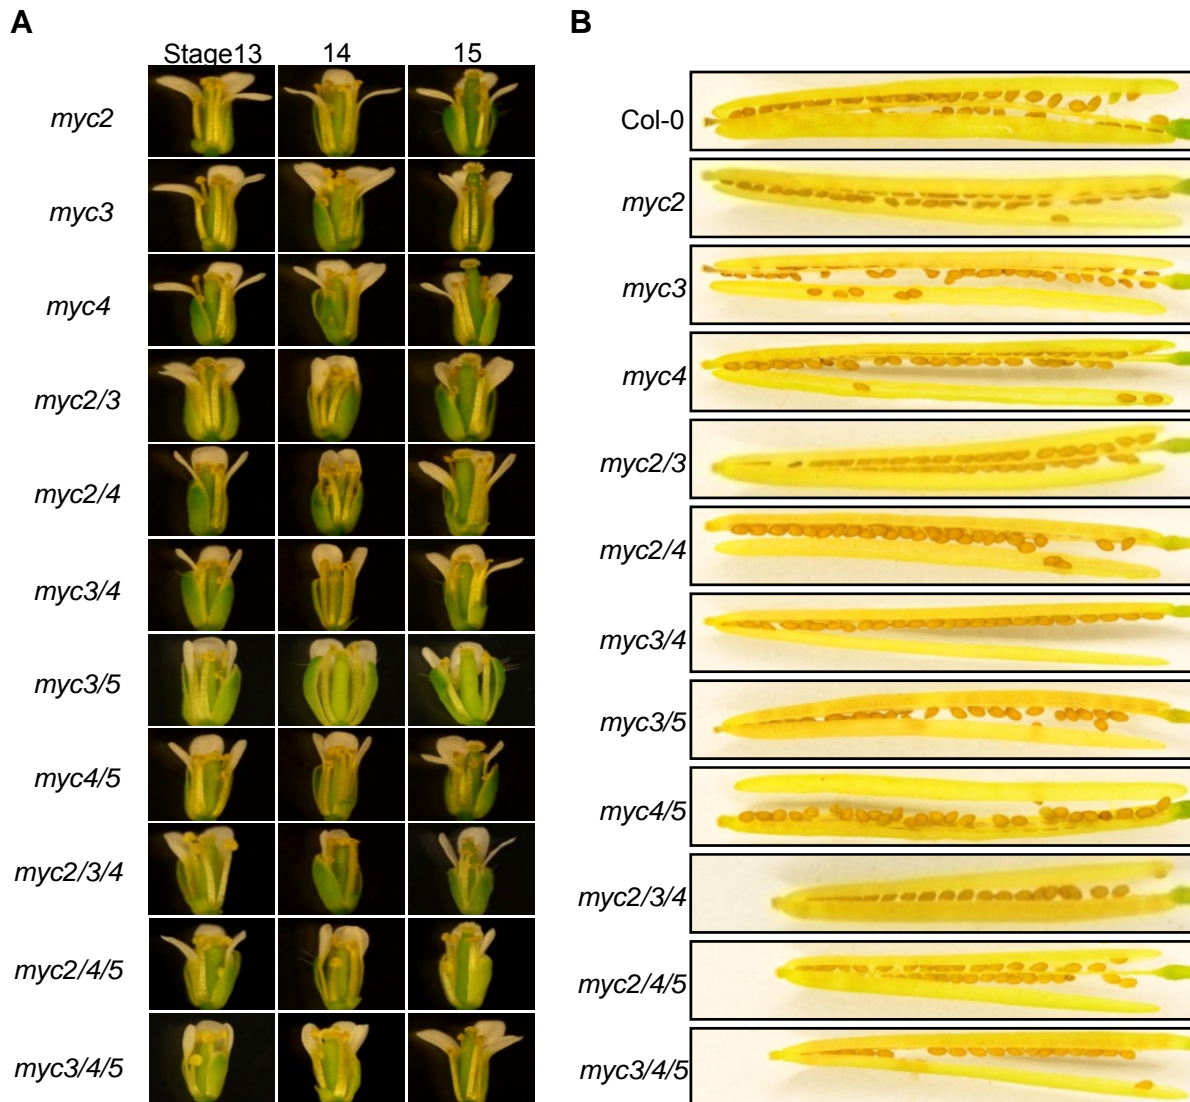

**Supplemental Figure 5. The bHLH Subgroup IIIe Factors Function Redundantly to Regulate Filament Elongation and Seed Set.**

(A) Comparison of flowers at floral stage 13, 14 or 15 in *myc2*, *myc3*, *myc4*, *myc2 myc3* (*myc2/3*), *myc2 myc4* (*myc2/4*), *myc3 myc4* (*myc3/4*), *myc3 myc5* (*myc3/5*), *myc4 myc5* (*myc4/5*), *myc2 myc3 myc4* (*myc2/3/4*), *myc2 myc4 myc5* (*myc2/4/5*) and *myc3 myc4 myc5* (*myc3/4/5*).

(B) Siliques from the indicated genotypes.

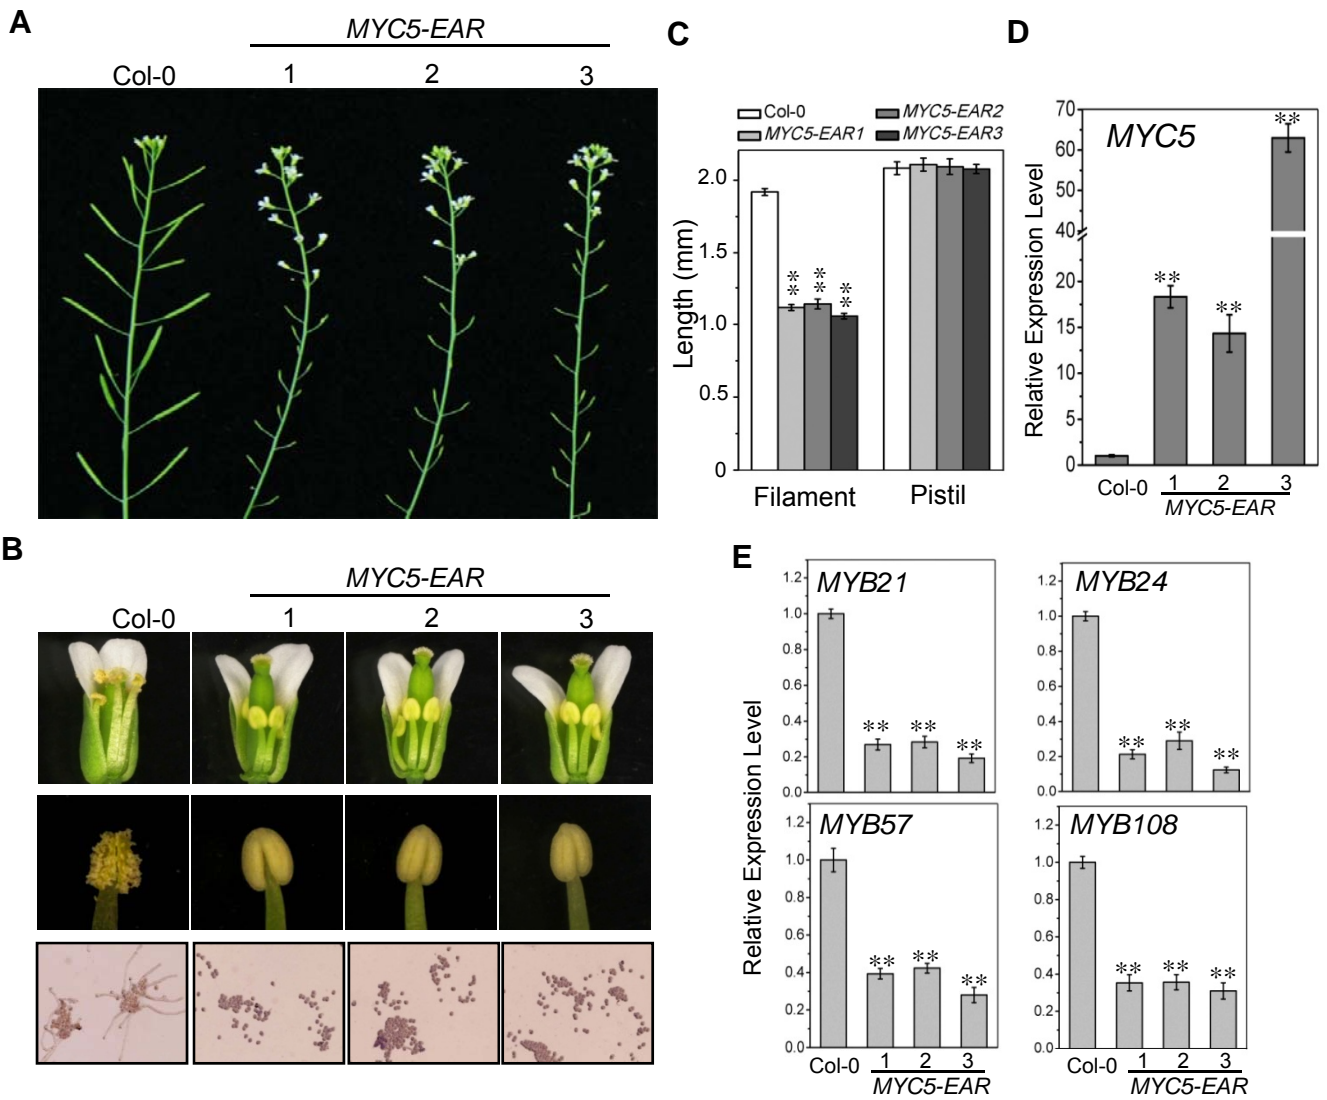

Supplemental Figure 6.

**Supplemental Figure 6. Overexpression of MYC5-EAR Leads to Male Sterility.**

(A) Main inflorescences in Col-0 wild-type and three *Arabidopsis* lines transgenic for EAR motif-fused MYC5 (*MYC5-EAR1*, *MYC5-EAR2* and *MYC5-EAR3*).

(B) Comparison of flowers (top), anthers (middle), and germination of pollen grains (bottom) from the flowers at floral stage 13 of Col-0 and the three *MYC5-EAR* lines.

(C) Filament length and pistil length at floral stage 13 in the indicated genotypes. Values are means ( $\pm$ SE) from three biological replicates. Asterisks represent Student's *t*-test significance compared with Col-0 wild-type (\*\* $P < 0.01$ ).

(D) Quantitative real-time PCR analysis for *MYC5* in 3-week-old plants of the indicated genotypes using *ACTIN8* as the internal control. Values are means ( $\pm$ SE) from three biological replicates. Asterisks represent Student's *t*-test significance compared with Col-0 wild-type (\*\* $P < 0.01$ ).

(E) Quantitative real-time PCR analysis for *MYB21*, *MYB24*, *MYB57* and *MYB108* in young flower buds of the indicated genotypes using *ACTIN8* as the internal control. Values are means ( $\pm$ SE) from three biological replicates. Asterisks represent Student's *t*-test significance compared with Col-0 wild-type (\*\* $P < 0.01$ ).

.

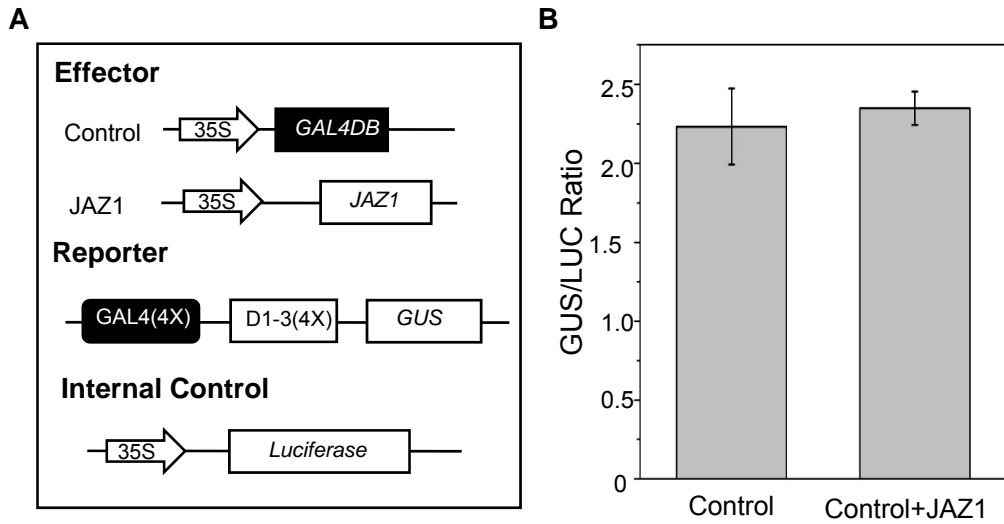

**Supplemental Figure 7. JAZ1 Cannot Attenuate the Basal Activity of GAL4DB.**

(A) The schematic diagrams show the constructs used in the transient expression assays in (B).

(B) Transient expression assays show that JAZ1 cannot inhibit the basal activity of GAL4 DNA Bind domain (GAL4DB). Values are means ( $\pm$ SE) from three biological replicates.



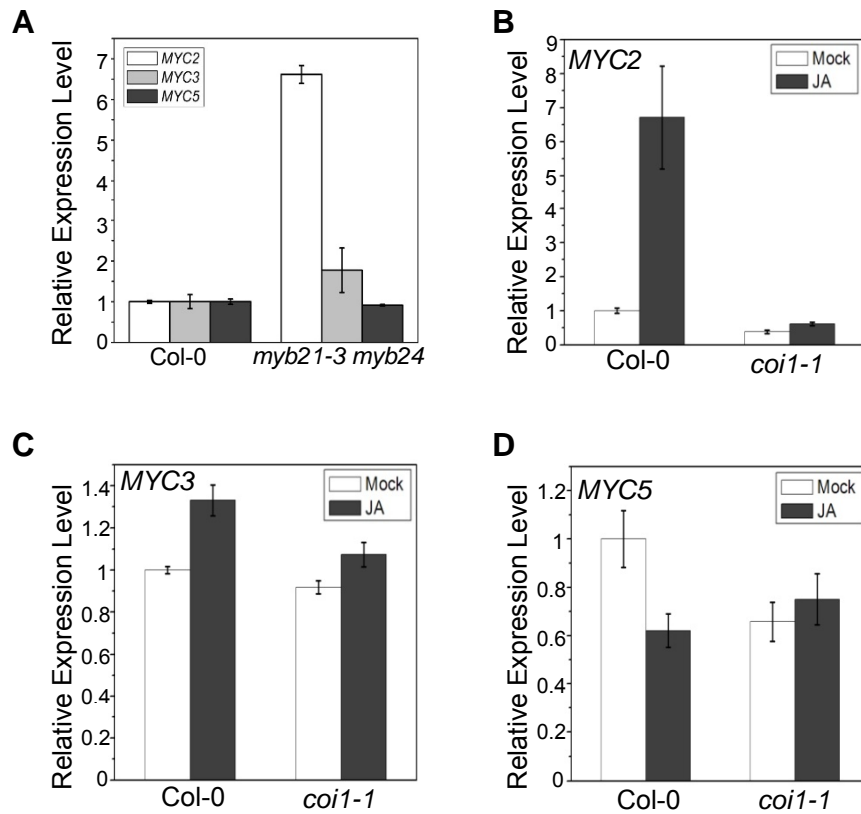

**Supplemental Figure 8. Expression Level of *MYC2*, *MYC3* and *MYC5* in *myb21-3 myb24* and *coi1-1* Mutant.**

(A) Quantitative real-time PCR analysis for *MYC2*, *MYC3* and *MYC5* in young flower buds of Col-0 wild-type and the *myb21-3 myb24* mutant using *ACTIN8* as the internal control. Values are means ( $\pm$ SE) from three biological replicates.

(B-D) Quantitative real-time PCR analysis for *MYC2* (B), *MYC3* (C) and *MYC5* (D) in the young flower buds of Col-0 and *coi1-1* treated without (Mock) or with methyl-jasmonate (JA) for 4 hours. *ACTIN8* was used as the internal control. Values are means ( $\pm$ SE) from three biological replicates.

**Supplemental Table 1. Primers Used for Vector Construction.**

|               |               |                                    |
|---------------|---------------|------------------------------------|
| JAZ1 pLexA    | Forward-EcoRI | cccgaattcatgtcgagttctatggaatg      |
| JAZ1 pLexA    | Reverse-SalI  | aaaagtcgactcatatttcagctgctaaacc    |
| JAZ2 pLexA    | Forward-EcoRI | cccgaattcatgtcgagttttctgccgagtg    |
| JAZ2 pLexA    | Reverse-XhoI  | accgctcgagttaccgtgaactgagccaagctg  |
| JAZ3 pLexA    | Forward-EcoRI | ggggaattcatggagagagattttctcgggttg  |
| JAZ3 pLexA    | Reverse-XhoI  | cccgctcgagttaggttcagagctgagagaag   |
| JAZ4 pLexA    | Forward-EcoRI | ggggaattc atggagagagattttctcgggctg |
| JAZ4 pLexA    | Reverse-XhoI  | cccgctcgagttagtgcatgatgagctggag    |
| JAZ5 pLexA    | Forward-EcoRI | cccgaattcatgtcgtcgagcaatgaaaatgc   |
| JAZ5 pLexA    | Reverse-XhoI  | cccgctcgagctatagccttagatcgagatc    |
| JAZ6 pLexA    | Forward-EcoRI | ggggaattcatgtcaacgggacaagcggcgag   |
| JAZ6 pLexA    | Reverse- XhoI | cccgctcgagctaaagcttgagtcaaggtt     |
| JAZ7 pLexA    | Forward-EcoRI | cccgaattcatgatcatcatcatcaaaaactg   |
| JAZ7 pLexA    | Reverse-XhoI  | accgctcgagctatcggtaacggtgtaagg     |
| JAZ8 pLexA    | Forward-NcoI  | ccccccatggatgaagctacagcaaaattgtg   |
| JAZ8 pLexA    | Reverse-XhoI  | gggctcgagttatcgtcgtgaatggtacggtg   |
| JAZ9 pLexA    | Forward-EcoRI | ggggaattc atggaaagagattttctcgggttg |
| JAZ9 pLexA    | Reverse-XhoI  | ccgctcgagttatgtaggagaagtagaagag    |
| JAZ10 pLexA   | Forward-EcoRI | ggggaattcatgtcgaaagctaccatagaactcg |
| JAZ10 pLexA   | Reverse-SalI  | acgcgtcgac ttaggccgatgtcggatagtaag |
| JAZ11 pLexA   | Forward-EcoRI | ggggaattcatggctgaggtaaacggagatttc  |
| JAZ11 pLexA   | Reverse-SalI  | aaaagtcgactcatgtcacaatggggctgg     |
| JAZ12 pLexA   | Forward-BamHI | cccggatccatgactaaggtgaaagatgagcc   |
| JAZ12 pLexA   | Reverse-SalI  | acgcgtcgacctaaagcagttggaaattcctcc  |
| JAZ11NT pLexA | Forward-EcoRI | ggggaattcatggctgaggtaaacggagatttc  |
| JAZ11NT pLexA | Reverse-SalI  | aaaagtcgactcatgctgtcgatacgcaagctac |
| JAZ11CT pLexA | Forward-EcoRI | ggggaattcaaagccactgagacaattaatt    |
| JAZ11CT pLexA | Reverse-SalI  | aaaagtcgactcatgtcacaatggggctgg     |

|                  |                |                                                             |
|------------------|----------------|-------------------------------------------------------------|
| MYB21NT<br>pLexA | Forward-MfeI   | cgccaattgatggagaaaagaggaggaggaag                            |
| MYB21NT<br>pLexA | Reverse-XhoI   | cccgctcgagtcacgaatagttaccatagttg                            |
| MYB24NT<br>pLexA | Forward-EcoRI  | ggggaattcatggagaaaagagaaagtagtg                             |
| MYB24NT<br>pLexA | Reverse-XhoI   | ccgctcgagtcaataattaccataattaagc                             |
| MYC5 pB42AD      | Forward-MfeI   | ccccaattgatgattaataaccgacgataactta                          |
| MYC5 pB42AD      | Reverse-SalI   | acgcgctgactcagctaatttcgacatcaacaa                           |
| MYC5NT<br>pB42AD | Forward-MfeI   | cgccaattgatgattaataaccgacgataactta                          |
| MYC5NT<br>pB42AD | Reverse-SalI   | aaaagtcgactcacgggttaccggttacagtacttg                        |
| MYC5CT<br>pB42AD | Forward- EcoRI | ggggaattcatgccggttttggttaccggttcggatc                       |
| MYC5CT<br>pB42AD | Reverse-XhoI   | ccgctcgagtcagctaatttcgacatcaacaa                            |
| JAZ1 nYFP        | Forward        | cggacaagtttgtaaaaaagcaggctccatgctgagt<br>tctatggaatgttc     |
| JAZ1 nYFP        | Reverse        | cggaccactttgtacaagaaagctgggtctatttcagctg<br>ctaaaccgag      |
| JAZ10-nYFP       | Forward        | cggacaagtttgtaaaaaagcaggctccatgctgaaa<br>gctaccatagaac      |
| JAZ10-nYFP       | Reverse        | cggaccactttgtacaagaaagctgggtcggccgatgctc<br>ggatagtaag      |
| MYC2-nYFP        | Forward        | cggacaagtttgtaaaaaagcaggctccatgactgatt<br>accggctacaaccaacg |
| MYC2-nYFP        | Reverse        | cggaccactttgtacaagaaagctgggtcaccgatttttg                    |

|            |                 |                                                             |
|------------|-----------------|-------------------------------------------------------------|
|            |                 | aatcaacttg                                                  |
| MYC3-nYFP  | Forward         | cggacaagttgtacaaaaagcaggctccatgaacgg<br>cacaacatcatcaatcaac |
| MYC3-nYFP  | Reverse         | cggaccactttgtacaagaaagctgggtcatagtttctcc<br>gactttcgtc      |
| MYC4-nYFP  | Forward         | cggacaagttgtacaaaaagcaggctccatgtctccg<br>acgaatgtcaagtaac   |
| MYC4-nYFP  | Reverse         | cggaccactttgtacaagaaagctgggtctggacattctc<br>caactttctccg    |
| MYC5-nYFP  | Forward         | cggacaagttgtacaaaaagcaggctccatgattaata<br>ccgacgataacttattg |
| MYC5-nYFP  | Reverse         | cggaccactttgtacaagaaagctgggtcgctaattttcg<br>acatcaacaatc    |
| cYFP-MYC5  | Forward         | cggacaagttgtacaaaaagcaggctccatgattaata<br>ccgacgataactta    |
| cYFP- MYC5 | Reverse         | cggaccactttgtacaagaaagctgggtctgctaattttcg<br>acatcaacaa     |
| cYFP-MYB21 | Forward         | cggacaagttgtacaaaaagcaggctccatggagaa<br>aagaggaggaggaag     |
| cYFP-MYB21 | Reverse         | cggaccactttgtacaagaaagctgggtctcaattaccatt<br>caataaatg      |
| cYFP-MYB24 | Forward         | cggacaagttgtacaaaaagcaggctccatggagaa<br>aagagaaagtagtg      |
| cYFP-MYB24 | Reverse         | cggaccactttgtacaagaaagctgggtcttaattaccatt<br>atatatattc     |
| GFP-MYC5   | Forward-MfeI    | cgccaattgatgattaataccgacgataactta                           |
| GFP-MYC5   | Reverse-HindIII | agaaagcttcagctaattttcgacatcaacaatc                          |
| pMYC5::GUS | Forward-HindIII | agaaagcttcaccattacataaaaactaa                               |
| pMYC5::GUS | Reverse-SalI    | acgcgtcgaccgttccggagtattagaagtcgtctc                        |
| DB MYC2    | Forward- SmaI   | tccccggggatgactgattaccggctacaaccaacg                        |
| DB MYC2    | Reverse- SmaI   | tccccgggtaaccgattttgaaatcaacttg                             |

|                        |                |                                                                                |
|------------------------|----------------|--------------------------------------------------------------------------------|
| DB MYC3                | Forward- SmaI  | tccccggggatgaacggcacaacatcatcaatcaac                                           |
| DB MYC3                | Reverse- XhoIR | acgctcgactcaatagttttctccgactttcgtc                                             |
| DB MYC4                | Forward- SmaI  | tccccggggatgtctccgacgaatgttcaagtaac                                            |
| DB MYC4                | Reverse- XhoIR | acgctcgactcatggacatttccaactttctccg                                             |
| DB MYC5                | forward-SmaI   | tccccggggatgattaataccgacgataacttattg                                           |
| DB MYC5                | reverse- SalI  | acgctcgactcagctaattttcgacatcaacaaatc                                           |
| DB MYB21               | forward-SmaI   | agaccggggatggagaaaagaggaggagg                                                  |
| DB MYB21               | reverse- SalI  | acgctcgactcaattaccattcaataaatgc                                                |
| DB MYB24               | forward-SmaI   | agaccggggatggagaaaagagaaagtagtg                                                |
| DB MYB24               | reverse- SalI  | acgctcgacttaattaccattatatattcatg                                               |
| JAZ1-pGreenII<br>62-SK | Forward-SacI   | atcgagctcatgtcagttctatggaatg                                                   |
| JAZ1-pGreenII<br>62-SK | Reverse-SalI   | agagtcgactcatatttcagctgctaaac                                                  |
| MYC3<br>Overexpresion  | Forward-SalI   | acgctcgacatgaacggcacaacatcatcaatcaac                                           |
| MYC3<br>Overexpresion  | Reverse-SpeI   | cggactagtcaatagttttctccgactttcgtcatc                                           |
| MYC5<br>Overexpresion  | Forward-SalI   | acgctcgacatgattaataccgacgataacttattg                                           |
| MYC5<br>Overexpresion  | Reverse-SpeI   | cggactagttagctaattttcgacatcaacaaatc                                            |
| MYC5-EAR               | Forward-SalI   | acgctcgacatgattaataccgacgataacttattg                                           |
| MYC5-EAR               | Reverse-SpeI   | cggactagtcaagcgaatccaagacgaagtccaagtc<br>taggtctagtcgctaattttcgacatcaacaaatccc |
| myc-MYB21              | Forward-SmaI   | agaccggggatggagaaaagaggaggaggaag                                               |
| myc-MYB21              | Reverse-SacI   | atcgagctctcaattaccattcaataaatgca                                               |
| flag-MYC5              | Forward-SalI   | acgctcgacatgattaataccgacgataacttattg                                           |
| flag-MYC5              | Reverse-SpeI   | cggactagttagctaattttcgacatcaacaaatc                                            |

**Supplemental Table 2. Primers for Quantitative Real-time PCR Analysis.**

|                                                   |         |                             |
|---------------------------------------------------|---------|-----------------------------|
| MYC5-Realtime PCR                                 | Forward | aacgtgaagatggggttgag        |
| MYC5-Realtime PCR                                 | Reverse | tcgacatcaacaaatccctaag      |
| MYC2-Realtime PCR                                 | Forward | tccgagtcagggttcattct        |
| MYC2-Realtime PCR                                 | Reverse | tctcgggagaaagtgttattgaa     |
| MYC3-Realtime PCR                                 | Forward | aggttgggatgtgatgatacg       |
| MYC3-Realtime PCR                                 | Reverse | aacctagcaccgggatgat         |
| MYC4-Realtime PCR                                 | Forward | aactctttaatctccgggtgtg      |
| MYC4-Realtime PCR                                 | Reverse | tgtaacttctcatctccagcttc     |
| MYC5-Realtime PCR<br>(Pair1-F for<br>Salk_060048) | Forward | tgacggatattggagtgttctt      |
| MYC5-Realtime PCR<br>(Pair1-R for<br>Salk_060048) | Reverse | cccgtaaatcagatccgaaccgg     |
| MYC5-Realtime PCR<br>(Pair2-F for<br>Salk_060048) | Forward | catgcggcgatgtactgagtt       |
| MYC5-Realtime PCR<br>(Pair2-R for<br>Salk_060048) | Reverse | tgagggacgacgttttgaatct      |
| MYB21-Realtime PCR                                | Forward | gctaagtggggaacaggtg         |
| MYB21-Realtime PCR                                | Reverse | cgattgcttgatgtattttgaa      |
| MYB24-Realtime PCR                                | Forward | tggaactctctcccaatc          |
| MYB24-Realtime PCR                                | Reverse | gcacatcaggtcggaggtag        |
| MYB57-Realtime PCR                                | Forward | tgctaagcttggaacaggtg        |
| MYB57-Realtime PCR                                | Reverse | tgacactttcatgtgtctctgaatc   |
| MYB108-Realtime<br>PCR                            | Forward | ttttaagctcatgaattacattgctac |

|                        |         |                      |
|------------------------|---------|----------------------|
| MYB108-Realtime<br>PCR | Reverse | tttaccggtgcgttgag    |
| Actin8-Realtime PCR    | Forward | tcagcactttccagcagatg |
| Actin8-Realtime PCR    | Reverse | ctgtggacaatgcctggac  |
